# Supplementary material for: Phylogeny and Morphology Determine Vulnerability to Global Warming in Pristimantis Frogs
Source: MDPI journal article supplement (doi:10.3390/land12010130), 2022-12-31
Supplement: s1 [file s1]

**Phylogeny and morphology determine vulnerability to global warming in *Pristimantis*  
frogs**

Pamela González-del-Pliego<sup>a,b,\*</sup>, Robert P. Freckleton<sup>a</sup>, Brett R. Scheffers<sup>c</sup>, Edmund W.

Basham<sup>c,d</sup>, Andrés R. Acosta-Galvis<sup>e</sup>, Claudia A. Medina Uribe<sup>e</sup>, Torbjørn Haugaasen<sup>f</sup>, David  
P. Edwards<sup>a</sup>

<sup>a</sup>Ecology and Evolutionary Biology, School of Biosciences, University of Sheffield, S10 2TN,  
UK. <sup>b</sup>Rui Nabeiro Biodiversity Chair, MED Institute, Universidade de Évora, Évora, Portugal

<sup>c</sup>Department of Wildlife Ecology & Conservation, Newins-Ziegler Hall, University of  
Florida/IFAS, Gainesville, FL 32611, USA. <sup>d</sup>Department of Geography, University of Sheffield,  
S10 2TN, UK. <sup>e</sup>Instituto de Investigación de Recursos Biológicos Alexander von Humboldt,  
Bogotá Calle 28A # 15-09, Colombia. <sup>f</sup>Faculty of Environmental Sciences and Natural  
Resource Management, Norwegian University of Life Sciences, 1432 Ås, Norway.

\*pgonzalezdelpliego@gmail.com

**This supplement contains:**

Supplementary Table S1 – S2

Table S1. Total number of individuals collected per species and habitat type. CP: cattle pasture; YSF: young secondary forest; OSF: old secondary forest; PF: primary forest. Asterisks indicate the species used in the main manuscript.

|                             | CP | YSF | OSF | PF  |
|-----------------------------|----|-----|-----|-----|
| <i>P. achatinus</i> *       | 13 | 0   | 0   | 0   |
| <i>P. baiotis</i>           | 0  | 0   | 1   | 0   |
| <i>P. brevifrons</i>        | 0  | 0   | 1   | 2   |
| <i>P. calcaratus</i> *      | 0  | 0   | 0   | 15  |
| <i>P. erythropleura</i> *   | 6  | 12  | 1   | 0   |
| <i>P. juanchoi</i> *        | 0  | 0   | 4   | 7   |
| <i>P. kelephus</i>          | 0  | 0   | 0   | 6   |
| <i>P. myops</i>             | 0  | 0   | 1   | 1   |
| <i>P. orpacobates</i> *     | 0  | 20  | 13  | 21  |
| <i>P. ptochus</i>           | 0  | 0   | 1   | 5   |
| <i>P. quantus</i> *         | 0  | 0   | 8   | 32  |
| <i>P. zophus</i> *          | 0  | 3   | 8   | 41  |
| Total number of individuals | 19 | 35  | 38  | 130 |

Table S2. Summary of linear mixed effect model of environmental and phylogenetic factors on CT<sub>max</sub> variation with full dataset (12 species of frogs and 222 individuals; see Table S1).

|        |                                | value (se)      | z     | p                |
|--------|--------------------------------|-----------------|-------|------------------|
| Fixed  | Cattle pasture                 | 20.43 (4.45)    | 4.59  | <0.001           |
|        | (Intercept)                    |                 |       |                  |
|        | Young secondary forest         | 0.19 (0.76)     | 0.25  | 0.80             |
|        | Old secondary forest           | 0.62 (1.04)     | 0.60  | 0.55             |
|        | Primary forest                 | 0.78 (1.08)     | 0.73  | 0.47             |
|        | Elevation                      | -0.0007 (0.001) | -0.44 | 0.66             |
|        | Max temperature                | 0.019 (0.11)    | 0.17  | 0.87             |
|        | Climatic niche breadth         | 0.045 (0.11)    | 0.39  | 0.70             |
|        | SVL (body size)                | 1.39 (0.27)     | 5.08  | <b>&lt;0.001</b> |
|        |                                |                 |       |                  |
| Random |                                |                 | Std   | Variance         |
|        |                                |                 | Dev   |                  |
|        | Phylogenetic signal (V)        |                 | 0.62  | <b>0.38</b>      |
|        | Variation in species means (S) |                 | 0.19  | 0.037            |
|        | Error variance (I)             |                 | 0.22  | 0.04             |
